# Supplementary material for: Digital preparation and osteology of the skull of Lesothosaurus diagnosticus (Ornithischia: Dinosauria)
Source: PubMed Central journal article supplement (PMC4690377; doi:10.7717/peerj.1494), 2015-12-21

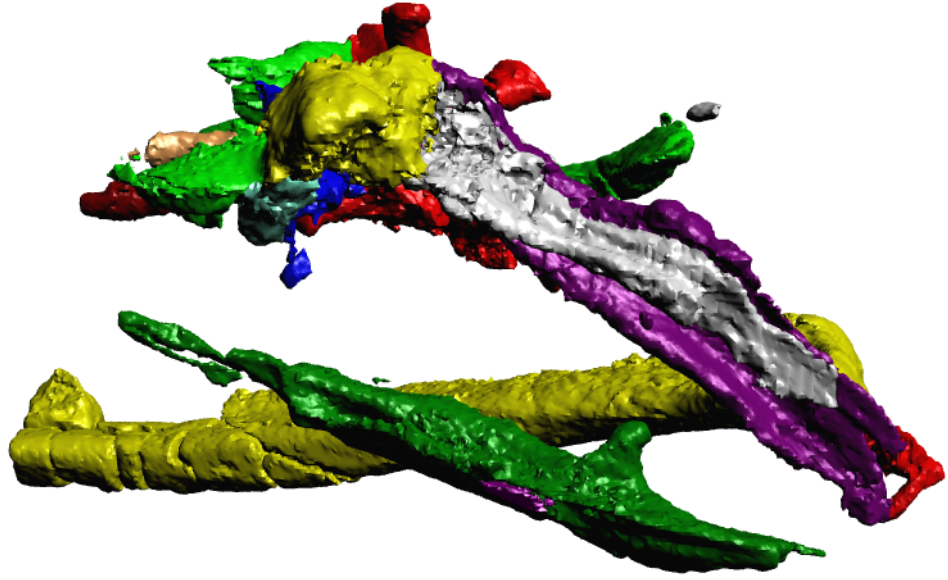

Supplement: peerj-03-1494-s004.pdf [file peerj-03-1494-s004.pdf]
